# Supplementary material for: Kinetics-bolstered catalytic study of a high performance lipase-immobilized nanofiber membrane bioreactor
Source: Royal Society of Chemistry journal article supplement (doi:10.1039/c3ra46779a), 2013-12-19
Supplement: c3ra46779a.pdf [file c3ra46779a.pdf]

## Supplementary Information

# Kinetics-Bolstered Catalytic Study of a High Performance Lipase-Immobilized Nanofiber Membrane Bioreactor

Peng-Cheng Chen, Xiao-Jun Huang<sup>\*</sup>, Zhi-Kang Xu

MOE Key Laboratory of Macromolecular Synthesis and Functionalization, Department  
of Polymer Science and Engineering, Zhejiang University, Hangzhou 310027, China

---

<sup>\*</sup> Corresponding author. Address: Key Laboratory of Macromolecular Synthesis and Functionalization, Department of Polymer Science and Engineering, Zhejiang University, 38 Zhe Da Road, Hangzhou, 310027, China.  
Tel.: +86 571 87952605; fax: +86 571 87951773.  
E-mail address: hxjzxh@zju.edu.cn.

**Table S.1** Chemical composition of the PANCAA nanofiber membrane surface during immobilization reactions.

|                             | C <sub>1s</sub> (mol%) | O <sub>1s</sub> (mol%) | N <sub>1s</sub> (mol%) |
|-----------------------------|------------------------|------------------------|------------------------|
| PANCAA membrane             | 67.57                  | 8.85                   | 23.58                  |
| EDC/NHS activated membrane  | 63.89                  | 10.51                  | 25.60                  |
| Lipase-immobilized membrane | 56.37                  | 13.45                  | 30.18                  |

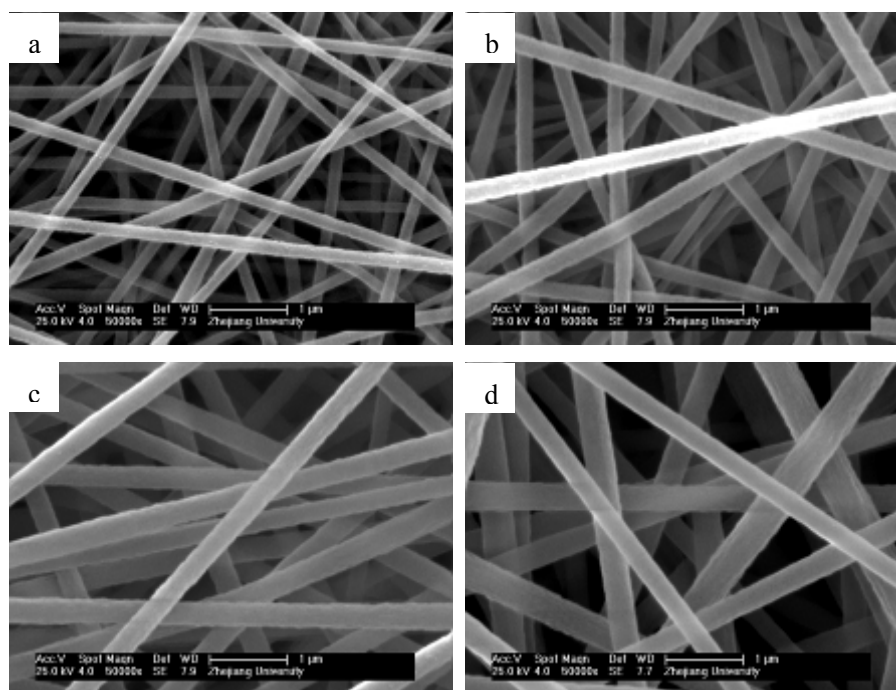

**Fig. S.1** Scanning electron microscope (SEM) micrographs of the nanofiber membranes with different fiber diameters.

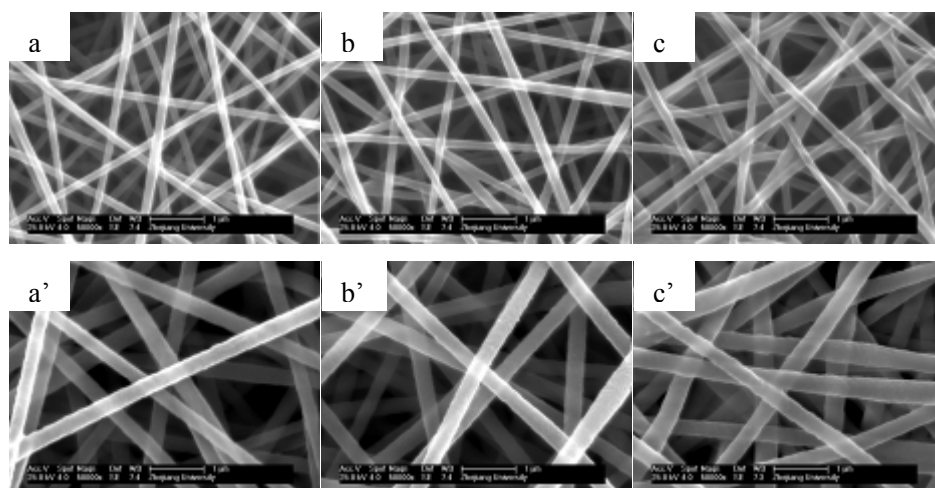

**Fig. S.2** SEM micrographs of the nanofiber membranes during reactions in the bioreactor. Nanofiber membrane with a fiber diameter of  $156.1 \pm 23.3$  nm after activation (a), lipase immobilization (b) and olive oil hydrolysis (c) processes. Nanofiber with a fiber diameter of  $271.2 \pm 30.3$  nm after activation (a'), lipase immobilization (b') and olive oil hydrolysis (c') processes.

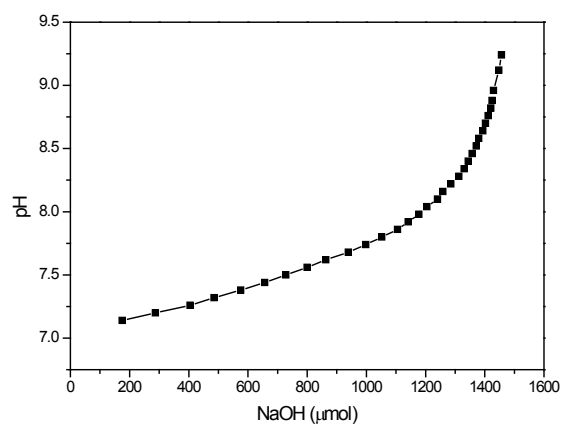

**Fig. S.3** Titration of PBS (0.05 M, pH 7.0) with NaOH.
